# Supplementary material for: Transcriptional profiling analysis of Spodoptera litura larvae challenged with Vip3Aa toxin and possible involvement of trypsin in the toxin activation
Source: PubMed Central journal article supplement (PMC4812304; doi:10.1038/srep23861), 2016-03-30
Supplement: srep23861-s1.pdf [file srep23861-s1.pdf]

**Transcriptional profiling analysis of *Spodoptera litura* larvae challenged with  
Vip3Aa toxin and possible involvement of trypsin in the toxin activation**

Feifei Song<sup>1</sup>, Chen Chen<sup>1</sup>, Songqing Wu<sup>1</sup>, Ensi Shao<sup>1</sup>, Mengnan Li<sup>1</sup>, Xiong Guan<sup>1</sup>,  
Zhipeng Huang<sup>1,\*</sup>

<sup>1</sup>Key Laboratory of Biopesticide and Chemical Biology, Ministry of Education, Fujian Agriculture  
and Forestry University, 350002 Fuzhou, Fujian, People's Republic of China

\*Corresponding author: zhipengh6841@163.com

Telephone number: 86-0591-83789258

Fax number: 86-0591-83789259

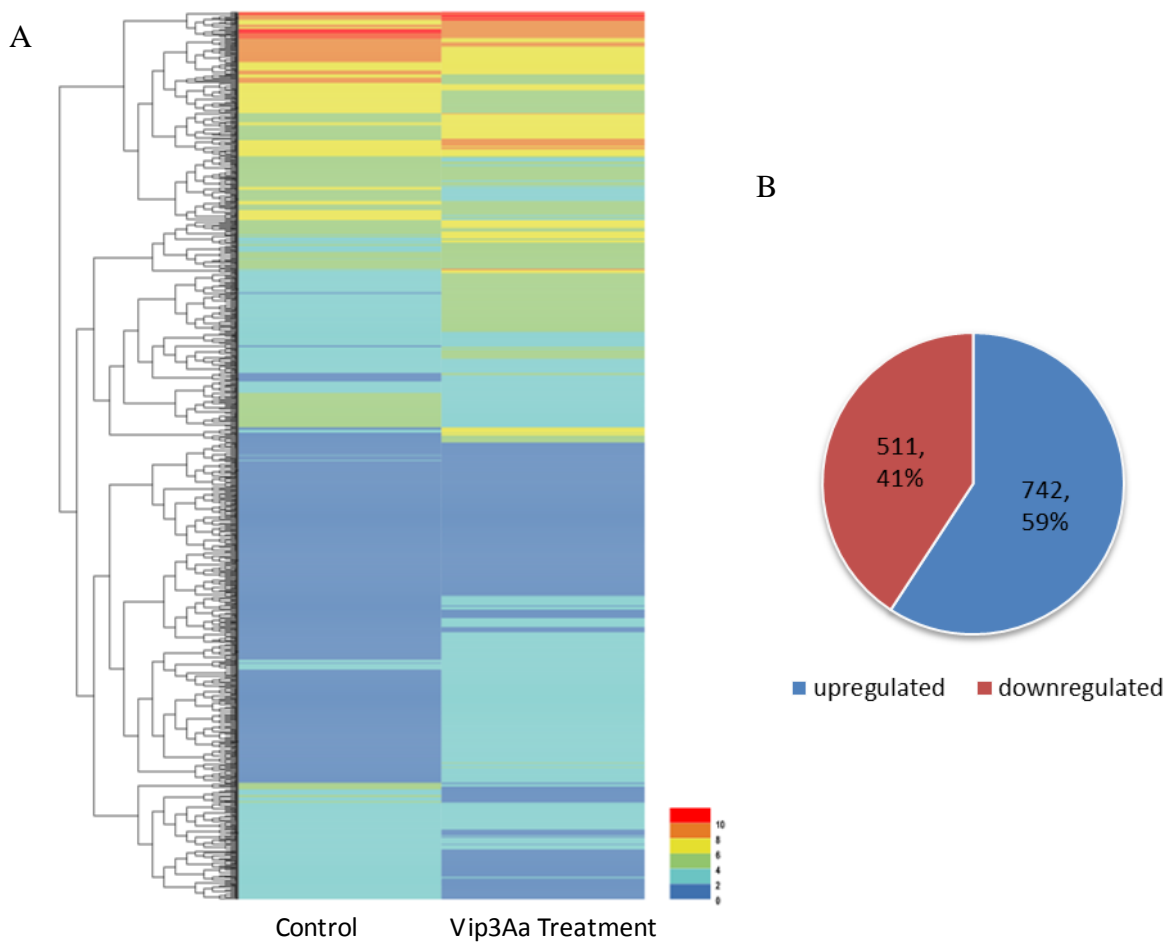

Figure S1. Differentially regulated genes of *S. litura* midgut during Vip3Aa intoxication. (A) Clustering analyses of DEGs after Vip3Aa intoxication. Each column represents a treatment, and each row represents a unigene. (B) Numbers of DGE unigenes of control and Vip3Aa-treated *S. litura*.

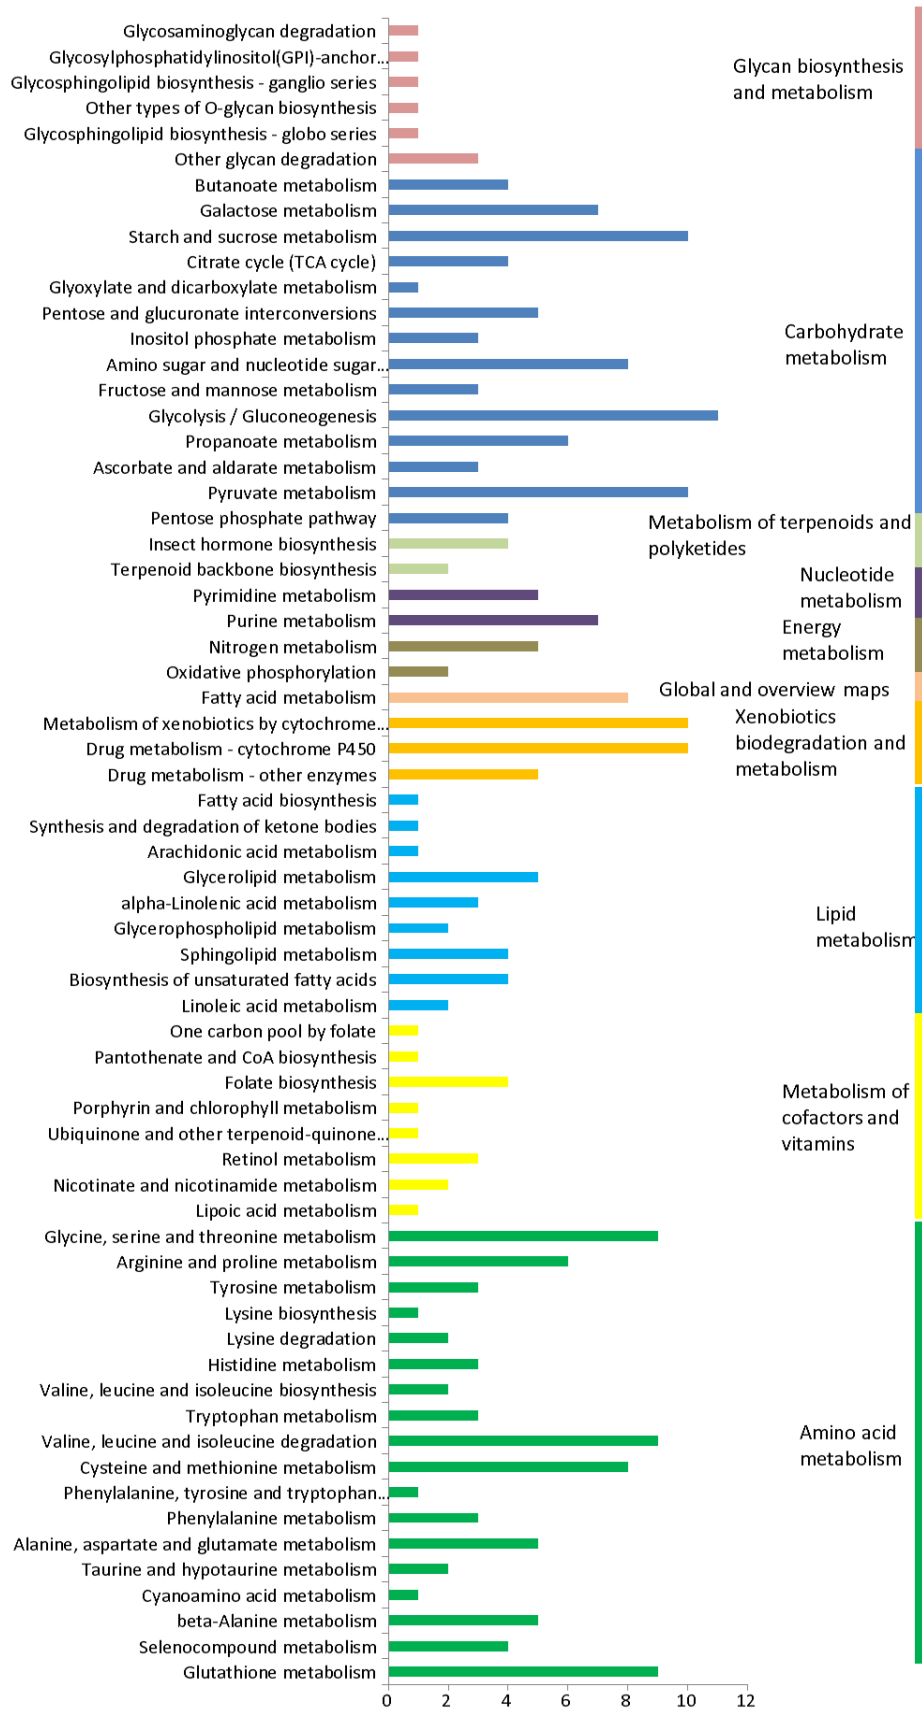

Figure S2 Summary of metabolism unigenes of *S. litura* larvae in response to the ingestion of Vip3Aa toxin.

Table S1 Immune-related unigenes of *S. litura* larvae in response to the ingestion of Vip3Aa toxin.

| Function    | Gene name          | Unigene ID       | nr_annotation                                                                                  | FDR                                                                  | log2FC   | regulated |    |
|-------------|--------------------|------------------|------------------------------------------------------------------------------------------------|----------------------------------------------------------------------|----------|-----------|----|
| Recognition | PGRP               | c11677           | PREDICTED: peptidoglycan recognition protein 3-like [Bombyx mori]                              | 0.000509                                                             | -1.07437 | down      |    |
|             |                    | c21896           | peptidoglycan recognition protein C [Helicoverpa armigera]                                     | 3.33E-16                                                             | -1.9233  | down      |    |
|             |                    | c25233           | peptidoglycan recognition protein D [Ostrinia nubilalis]                                       | 1.28E-13                                                             | -2.65509 | down      |    |
|             |                    | c20498           | peptidoglycan recognition protein B [Helicoverpa armigera]                                     | 0                                                                    | -3.96387 | down      |    |
|             | Scavenger receptor | c6828            | PREDICTED: similar to scavenger receptor cysteine-rich protein isoform 1 [Tribolium castaneum] | 1.93E-07                                                             | 2.992627 | up        |    |
|             |                    | c20428           | scavenger receptor class B member 3 [Bombyx mori]                                              | 3.55E-06                                                             | 1.191757 | up        |    |
|             |                    | c19788           | PREDICTED: similar to scavenger receptor cysteine-rich protein isoform 1 [Tribolium castaneum] | 0.000173                                                             | 1.0774   | up        |    |
|             | lectin             | c19357           | C-type lectin [Heliothis virescens]                                                            | 2.11E-14                                                             | 1.768272 | up        |    |
|             |                    | c21695           | C-type lectin 21 [Danaus plexippus]                                                            | 2.60E-06                                                             | 1.725227 | up        |    |
|             |                    | c15770           | C-type lectin - mannose binding [Papilio xuthus]                                               | 6.75E-05                                                             | 1.632966 | up        |    |
|             | βGRP               | c5734            | beta-1,3-glucan recognition protein 1 [Helicoverpa armigera]                                   | 0.000137                                                             | 1.181256 | up        |    |
|             | hemolin            | c21312           | hemolin [Helicoverpa zea]                                                                      | 0                                                                    | 4.85713  | up        |    |
|             | Transduction       | Toll pathway     | c18385                                                                                         | hypothetical protein KGM_03967 [Danaus plexippus]                    | 8.90E-05 | 1.305731  | up |
|             |                    |                  | c23114                                                                                         | hypothetical protein KGM_14365 [Danaus plexippus]                    | 0.004367 | 1.18773   | up |
|             |                    | JAK-STAT pathway | c5690                                                                                          | PREDICTED: tyrosine-protein phosphatase corkscrew-like [Bombyx mori] | 3.15E-05 | 1.121856  | up |
| c17585      |                    |                  | Tyrosine-protein phosphatase non-receptor type 11 [Harpegnathos saltator]                      | 6.95E-06                                                             | -1.20448 | down      |    |
| c8425       |                    |                  | pi3k [Bombyx mori]                                                                             | 5.46E-07                                                             | -1.29876 | down      |    |
| MAPK        |                    | c18622           | PREDICTED: torso-like protein-like [Bombyx mori]                                               | 6.10E-08                                                             | 1.590182 | up        |    |
|             |                    | c17585           | Tyrosine-protein phosphatase non-receptor type 11 [Harpegnathos saltator]                      | 6.95E-06                                                             | -1.20448 | down      |    |

|                 |           |               |                                                           |          |          |    |
|-----------------|-----------|---------------|-----------------------------------------------------------|----------|----------|----|
| Melanization    | serpin    | c8129         | serine protease inhibitor [Papilio xuthus]                | 0        | 2.528995 | up |
|                 |           | c23321        | serine protease inhibitor 32 [Danaus plexippus]           | 2.45E-11 | 2.280243 | up |
|                 |           | c20956        | putative serpin [Hyphantria cunea]                        | 0.000251 | 1.127645 | up |
|                 | PPAE      | c20351        | prophenol oxidase activating enzyme 1 [Spodoptera litura] | 3.64E-05 | 1.171194 | up |
| Effector        | diapausin | c17679        | diapausin precursor [Spodoptera litura]                   | 0        | 3.160039 | up |
|                 | lysozyme  | <u>c20324</u> | lysozyme-like protein 1 [Antheraea mylitta]               | 5.27E-05 | 1.166284 | up |
|                 | defensin  | c20369        | defensin precursor [Spodoptera frugiperda]                | 0.004382 | 1.166916 | up |
| Immune response | Hdd23     | c21044        | immune-related Hdd23 [Hyphantria cunea]                   | 0.006028 | 1.473702 | up |
|                 | Hdd1      | c23168        | Hdd1-like protein [Trichoplusia ni]                       | 0        | 4.114703 | up |
|                 |           | c22806        | Hdd1-like protein [Danaus plexippus]                      | 1.98E-13 | 3.022464 | up |

PGRP= Peptidoglycan recognition protein;  $\beta$ GRP=  $\beta$  glucan recognition protein; PPAE= Prophenol oxydase activating enzyme.

Table S2 Unigenes homologous to the potentially Bt toxin receptors of *S. litura* larvae in response to the ingestion of Vip3Aa toxin.

| Gene name              | Unigene ID    | nr_annotation                                                               | FDR      | log2FC   | regulated |
|------------------------|---------------|-----------------------------------------------------------------------------|----------|----------|-----------|
| ALP                    | <u>c18356</u> | alkaline phosphatase [Spodoptera exigua]<br>PREDICTED: alkaline             | 0        | -1.9463  | down      |
|                        | c19507        | phosphatase, tissue-nonspecific isozyme-like [Bombyx mori]                  | 0        | -2.35337 | down      |
|                        | c19971        | alkaline phosphatase 1 [Spodoptera litura]                                  | 0        | -6.25675 | down      |
|                        | c19798        | alkaline phosphatase 1 [Spodoptera litura]                                  | 0        | -6.72673 | down      |
| G-protein <sup>1</sup> | c22536        | PREDICTED: D(4) dopamine receptor-like [Bombyx mori]                        | 0        | 1.985037 | up        |
|                        | c7152         | PREDICTED: protein trapped in endoderm-1-like [Bombyx mori]                 | 2.96E-14 | 2.008235 | up        |
|                        | <u>c16418</u> | neuropeptide receptor A17 [Bombyx mori]<br>PREDICTED: alpha-1A              | 4.08E-09 | 3.087901 | up        |
|                        | c16142        | adrenergic receptor-like [Bombyx mori]                                      | 0.001517 | 1.984716 | up        |
| cadherin               | c17909        | mutant cadherin [Helicoverpa armigera]                                      | 2.25E-07 | 1.570696 | up        |
|                        | c18147        | PREDICTED: protocadherin-like wing polarity protein stan-like [Bombyx mori] | 0.00113  | -1.25067 | down      |
| Aminopeptidase N (APN) | <u>c18685</u> | midgut class 1 aminopeptidase N [Spodoptera exigua]                         | 7.59E-08 | -1.3676  | down      |

<sup>1</sup> annotating by GO database.

Table S3. Summary of 73 significantly differentially expressed transcripts from *S. litura* larvae midgut in response to the ingestion of Vip3Aa toxin.

| Unigene ID    | nr_annotation                                                                      | FDR      | log2FC    | regulated |
|---------------|------------------------------------------------------------------------------------|----------|-----------|-----------|
| c12267        | cytochrome CYP340K4 [ <i>Spodoptera littoralis</i> ]                               | 2.85E-14 | 5.337373  | up        |
| c24505        | cytochrome P450 [ <i>Spodoptera litura</i> ]                                       | 0        | 5.754862  | up        |
| c25622        | cytochrome P450 [ <i>Helicoverpa armigera</i> ]                                    | 0        | 4.658589  | up        |
| c13139        | putative cytochrome P450 [ <i>Danaus plexippus</i> ]                               | 0        | 3.178457  | up        |
| c7824         | cytochrome P450 CYP321A7 [ <i>Spodoptera frugiperda</i> ]                          | 0        | 3.220674  | up        |
| c19112        | PREDICTED: cytochrome b561 domain-containing protein 2-like [ <i>Bombyx mori</i> ] | 0        | 2.127086  | up        |
| <u>c17866</u> | cytochrome P450 CYP4L4 [ <i>Mamestra brassicae</i> ]                               | 8.48E-07 | -1.250273 | down      |
| c23863        | cytochrome P450 [ <i>Spodoptera litura</i> ]                                       | 1.24E-13 | -2.53645  | down      |
| c20474        | cytochrome P450 [ <i>Spodoptera litura</i> ]                                       | 0        | -2.68906  | down      |
| c5076         | high-affinity choline transporter [ <i>Trichoplusia ni</i> ]                       | 4.43E-12 | 3.505538  | up        |
| c7083         | inorganic phosphate transporter 1 [ <i>Bombyx mori</i> ]                           | 0        | 2.546322  | up        |
| c14250        | endonuclease-reverse transcriptase [ <i>Danaus plexippus</i> ]                     | 0.000129 | 2.209259  | up        |
| c20410        | PREDICTED: B(0,+)-type amino acid transporter 1-like [ <i>Bombyx mori</i> ]        | 0        | 2.142664  | up        |
| c20269        | PREDICTED: B(0,+)-type amino acid transporter 1-like [ <i>Bombyx mori</i> ]        | 0        | -2.31621  | down      |
| c10280        | PREDICTED: facilitated trehalose transporter Tret1-1-like [ <i>Bombyx mori</i> ]   | 0        | -2.63001  | down      |
| c4690         | PREDICTED: facilitated trehalose transporter Tret1-like [ <i>Bombyx mori</i> ]     | 0        | -2.77639  | down      |
| c25073        | PREDICTED: monocarboxylate transporter 7-like [ <i>Bombyx mori</i> ]               | 9.09E-13 | -2.43759  | down      |
| c14430        | PREDICTED: monocarboxylate transporter 12-like [ <i>Bombyx mori</i> ]              | 0        | -2.67101  | down      |
| c11964        | PREDICTED: zinc transporter ZIP1-like [ <i>Bombyx mori</i> ]                       | 0        | -2.88921  | down      |
| c25542        | sugar transporter [ <i>Danaus plexippus</i> ]                                      | 5.32E-13 | -3.17118  | down      |
| c6659         | sugar transporter [ <i>Danaus plexippus</i> ]                                      | 0        | -3.68097  | down      |
| c18435        | very high density lipoprotein [ <i>Helicoverpa zea</i> ]                           | 0        | -4.06635  | down      |
| c19573        | very high density lipoprotein [ <i>Helicoverpa</i> ]                               | 0        | -4.09206  | down      |

|               |                                                                                   |          |          |      |
|---------------|-----------------------------------------------------------------------------------|----------|----------|------|
|               | zea]                                                                              |          |          |      |
| c6015         | very high density lipoprotein [Helicoverpa<br>zea]                                | 0        | -4.37953 | down |
| c22965        | antennal esterase CXE14 [Spodoptera<br>littoralis]                                | 0        | 4.883817 | up   |
| c9702         | antennal esterase CXE7 [Spodoptera<br>littoralis]                                 | 3.33E-13 | 3.05433  | up   |
| c22497        | chlorophyllide A binding protein<br>precursor [Bombyx mori]                       | 2.98E-09 | -2.95125 | down |
| c13497        | chlorophyllide A binding protein<br>precursor [Danaus plexippus]                  | 8.80E-10 | -3.73907 | down |
| c20168        | juvenile hormone binding protein an-0128<br>precursor [Bombyx mori]               | 0        | 2.565086 | up   |
| c20974        | juvenile hormone diol kinase [Antheraea<br>yamamai]                               | 0        | -5.4026  | down |
| c16299        | polycalin [Helicoverpa armigera]                                                  | 0        | -3.93479 | down |
| c15680        | polycalin [Trichoplusia ni]                                                       | 9.99E-16 | -2.97669 | down |
| c5571         | PREDICTED: ATP synthase subunit<br>gamma, mitochondrial-like [Bombyx<br>mori]     | 4.41E-13 | 3.89079  | up   |
| <u>c4599</u>  | H <sup>+</sup> transporting ATP synthase subunit d<br>[Danaus plexippus]          | 2.14E-08 | 2.389133 | up   |
| <u>c20814</u> | PREDICTED: heat shock protein<br>Hsp-16.1/Hsp-16.11-like [Bombyx mori]            | 0        | 2.841917 | up   |
| c16441        | PREDICTED: zinc finger MIZ<br>domain-containing protein 1-like<br>[Bombyx mori]   | 3.55E-15 | 2.891747 | up   |
| c24932        | PREDICTED: zinc finger MYND<br>domain-containing protein 10-like<br>[Bombyx mori] | 0        | -6.67029 | down |
| c16222        | Vanin-like protein 1 [Danaus plexippus]                                           | 0        | -2.05474 | down |
| c19029        | vanin-like protein 1 precursor [Papilio<br>xuthus]                                | 0        | -2.41942 | down |
| c25580        | PREDICTED: paired box protein<br>Pax-6-like [Bombyx mori]                         | 0        | 6.773916 | up   |
| c4816         | PREDICTED: tetraspanin-1-like [Bombyx<br>mori]                                    | 0        | 5.565138 | up   |
| c23506        | PREDICTED: solute carrier family 23<br>member 2-like [Bombyx mori]                | 0        | 5.169746 | up   |
| c19861        | PREDICTED: spidroin-1-like [Bombyx<br>mori]                                       | 0        | 5.083898 | up   |
| c10167        | putative fruitless [Danaus plexippus]                                             | 0        | 4.883817 | up   |
| c12275        | putative kelch-like 10 [Danaus plexippus]                                         | 1.60E-08 | 4.665885 | up   |
| c25411        | peritrophin-like protein [Spodoptera litura]                                      | 0        | 4.658589 | up   |



|               |                                                                                                               |          |          |      |
|---------------|---------------------------------------------------------------------------------------------------------------|----------|----------|------|
| c21060        | PREDICTED: formin-like protein 3-like<br>[ <i>Bombyx mori</i> ]                                               | 0        | 4.628245 | up   |
| c19188        | chemosensory protein [ <i>Papilio xuthus</i> ]                                                                | 0        | 4.453685 | up   |
| c21721        | PREDICTED: prostaglandin reductase<br>1-like [ <i>Bombyx mori</i> ]                                           | 0        | 4.369457 | up   |
| c6753         | PREDICTED: SOX domain-containing<br>protein dichaete-like [ <i>Bombyx mori</i> ]                              | 7.03E-14 | 3.965614 | up   |
| c29508        | PREDICTED: UPF0704 protein C6orf165<br>homolog [ <i>Bombyx mori</i> ]                                         | 3.62E-09 | 3.906445 | up   |
| c6816         | insulin-related peptide binding protein<br>[ <i>Spodoptera frugiperda</i> ]                                   | 0        | 3.667266 | up   |
| c21029        | ecdysteroid 22-kinase [ <i>Danaus plexippus</i> ]                                                             | 0        | 3.519465 | up   |
| c16125        | PREDICTED: nose resistant to fluoxetine<br>protein 6-like [ <i>Bombyx mori</i> ]                              | 0        | 3.358801 | up   |
| c12322        | RecName: Full=Seroin; AltName:<br>Full=Silk 23 kDa glycoprotein; Flags:<br>Precursor                          | 6.22E-06 | 3.225503 | up   |
| c24576        | PREDICTED: homeobox protein<br>orthopedia-like [ <i>Bombyx mori</i> ]                                         | 8.45E-12 | 3.045581 | up   |
| c6828         | PREDICTED: similar to scavenger<br>receptor cysteine-rich protein isoform 1<br>[ <i>Tribolium castaneum</i> ] | 1.93E-07 | 2.992627 | up   |
| c9909         | PREDICTED: mucin-3A-like [ <i>Bombyx mori</i> ]                                                               | 1.24E-09 | 2.55012  | up   |
| c22229        | proteophosphoglycan ppg4 [ <i>Leishmania braziliensis</i> MHOM/BR/75/M2904]                                   | 0        | 2.436892 | up   |
| c6587         | PREDICTED: T-related protein-like<br>[ <i>Bombyx mori</i> ]                                                   | 8.64E-05 | 2.431688 | up   |
| c19618        | PREDICTED: tubulin beta chain-like<br>[ <i>Aplysia californica</i> ]                                          | 1.12E-13 | 2.424683 | up   |
| c23038        | wing disc-specific protein [ <i>Bombyx mori</i> ]                                                             | 3.60E-08 | 2.399346 | up   |
| <u>c19079</u> | juvenile hormone epoxide hydrolase<br>[ <i>Spodoptera exigua</i> ]                                            | 0.000488 | -1.02732 | down |
| c11508        | TRAS3 [ <i>Bombyx mori</i> ]                                                                                  | 0        | -2.62016 | down |
| c21887        | gst1 [ <i>Spodoptera litura</i> ]                                                                             | 0        | -2.93568 | down |
| c19031        | apolipoporphin precursor protein [ <i>Bombyx mori</i> ]                                                       | 0        | -2.98517 | down |
| c18795        | REPAT1 [ <i>Spodoptera littoralis</i> ]                                                                       | 0        | -3.04743 | down |
| c15714        | PREDICTED: synaptic vesicle<br>glycoprotein 2A-like [ <i>Bombyx mori</i> ]                                    | 0        | -3.58343 | down |
| <u>c12563</u> | hypothetical protein KGM_15941<br>[ <i>Danaus plexippus</i> ]                                                 | 0        | -5.36763 | down |
| c11312        | PREDICTED: tubulin glycyclase 3A-like<br>[ <i>Bombyx mori</i> ]                                               | 0        | -7.3459  | down |

|               |                                                                             |          |          |      |
|---------------|-----------------------------------------------------------------------------|----------|----------|------|
| <u>c17167</u> | serine protease 33 [Mamestra configurata]                                   | 8.69E-07 | 1.293962 | up   |
| <u>c18827</u> | trypsin precursor AiT6 [Agrotis ipsilon]<br>PREDICTED: ATP-binding cassette | 1.08E-05 | -1.19949 | down |
| <u>c6408</u>  | sub-family G member 1-like [Bombyx<br>mori]                                 | 5.52E-09 | -1.39692 | down |

---

Table S4. Primers used for qRT-PCR amplifications.

| #ID            |         | Primer                   |
|----------------|---------|--------------------------|
| c18046         | Forward | TCGCATCATGGGTGAATGAA     |
|                | Reverse | GGTGTAGAAGAAGCAGGTGTAG   |
| c18827         | Forward | GTCATCATCCTCTTAGCCCTTT   |
|                | Reverse | ATGTTGGACATGTACGGGTATT   |
| c18685         | Forward | TTCCACTCCGCCTACTACTATC   |
|                | Reverse | GTAGGGTCAGAGAGAGGTTCTT   |
| c19079         | Forward | GGCAAGCAGGACAGTTCTAT     |
|                | Reverse | CGGTGGTTCTTTAGACGTAGTT   |
| c17866         | Forward | GATGAGAGCGTGAGAGAAGAAG   |
|                | Reverse | GACAGACAGTAGAGTGCGTATG   |
| c18356         | Forward | CGACGTAACCTTTGTACCCGATAA |
|                | Reverse | CCTCGGTCTTCCTTGTCTTTATT  |
| c20814         | Forward | GCCGTATTGGTTTCGTCATCT    |
|                | Reverse | GAAGAACGGGTCCCTCATAAAC   |
| c20324         | Forward | GTGAAGCACTGCTAGATGAAGA   |
|                | Reverse | GCCTCCCATTTTCGACCAATA    |
| c6408          | Forward | AGCAACGCTGGCTGTATATT     |
|                | Reverse | TCTCACAAACACGCTCATCTC    |
| c4599          | Forward | CGCTGAGGTGGACAAAGAAT     |
|                | Reverse | GCACCGTTTCCATCGTCATA     |
| c16418         | Forward | AGACCCACACACGTCATTATC    |
|                | Reverse | GCTCGGTTGGAGTTTCTTCT     |
| c12563         | Forward | GGAGCTGATGCAGTGATTCT     |
|                | Reverse | GGAGTTCCATATCTTGGGTCTATG |
| $\beta$ -actin | Forward | TGAGACCTTCAACTCCCCCG     |
|                | Reverse | GCGACCAGCCAAGTCCAGAC     |
